# Supplementary material
Source: Springer Nature journal article supplement (https://www.springermedizin.de/resource/supplementary/12884_2014_1123_MOESM5_ESM.pdf/9458964)
Supplement: MOESM5 [file 9458964]

|                                                | Pre-Pregnancy                                                                                                     | Pregnancy | Childbirth                                                        | Post-Partum        | Post-natal                                                   |
|------------------------------------------------|-------------------------------------------------------------------------------------------------------------------|-----------|-------------------------------------------------------------------|--------------------|--------------------------------------------------------------|
| Family & Community Care                        | Women Groups on MNH [23, 25, 26, 27, 28]                                                                          |           |                                                                   |                    |                                                              |
|                                                | Women Group Discussion by Midwives<br>On birth preparedness [29]                                                  |           |                                                                   |                    |                                                              |
|                                                | Media campaign Promote ANC [31]                                                                                   |           |                                                                   |                    |                                                              |
|                                                | Community mobilization by local leaders<br>On ANC [31, 32], syphilis testing [33],<br>TT-vaccine campaign [35]    |           | Community mobilization by local leaders<br>On facility birth [34] |                    | Trained CHWs/<br>volunteers in newborn care [32, 40, 41, 42] |
|                                                | Home-based pregnancy care by trained CHWs/volunteers<br>[32, 38, 40, 41, 42, 44] For IPTp [43]                    |           | Train TBAs [46]                                                   |                    |                                                              |
| Emergency Transport [38, 39]                   |                                                                                                                   |           |                                                                   |                    | Trained TBA in newborn care [45]                             |
| First-level Facilities<br>(including outreach) | Delivering Care: Home vs Community vs Facility<br>[30, 36, 47, 48] For TT-vaccine [35] IPTp [43]                  |           |                                                                   |                    |                                                              |
|                                                | Reduce cost of ANC & facility births (incl. vouchers) [24, 36, 37]                                                |           |                                                                   |                    |                                                              |
|                                                | Choice of Strategies for Service Delivery<br>HIV [49], Abortion care [50]                                         |           |                                                                   |                    |                                                              |
|                                                | Bamako initiative on primary care [51]                                                                            |           |                                                                   |                    |                                                              |
|                                                | Facility-based quality improvement initiative [23, 30]                                                            |           |                                                                   |                    |                                                              |
|                                                | Extend content of ANC services<br>Deliver ITNs, [52, 53], HIV testing [56],<br>Syphilis testing, [33, 54, 55, 57] |           | Improve facility birth<br>[34, 58]                                |                    | Improve newborn care<br>[58, 59]                             |
| Hospital                                       | Improve care in maternity hospitals [60, 61]                                                                      |           |                                                                   |                    |                                                              |
|                                                | Train new cadre in EmOC [62, 63]                                                                                  |           |                                                                   | Obst. Fistula [65] | Upgrade special neonatal care [64]                           |
